# Supplementary material for: The hetero-Diels–Alder addition of sulfur dioxide: structure of the first crystalline sultine. Quantum calculations on the conformations of 6-fluoro-3,6-dihydro-1,2-oxathiine 2-oxides
Source: Royal Society of Chemistry journal article supplement (doi:10.1039/b103096p), 2001-01-01
Supplement: b103096p.doc [file b103096p.doc]

SUPPLEMENTARY MATERIAL

The Hetero-Diels-Alder Addition of Sulfur Dioxide: Structure of the First Crystalline Sultine. Quantum Calculations on the Conformations of 6-Fluoro-3,6-dihydro-1,2-oxathiin-2-oxides.

Elena Roversi, Rosario Scopelliti, Euro Solari, Raphaël Estoppey, Pierre Vogel,[[1]](#footnote-2)[*] Pedro Braña, Bibiana Menéndez, and José Ángel Sordo[[2]](#footnote-3)[*]

**Synthetic procedures**

(*Z*)-**2**, (*E*)-**2**: Powdered *t*-BuOK (13.8 g, 36 mmol) was added portionwise to a stirred suspension of (fluoromethyl)tri­phenylphosphonium tetrafluoroborate (13.7 g, 36 mmol) in anhydrous THF (50 mL) at 25 °C under N2 atmosphere. After 15 min a solution of 2-(dimethyl­aminomethyl)tetralone (**1**,[4] 6.5 g, 33 mmol) in anh. THF (10 mL) was added under stirring at 0 °C. After 15 h at 25 °C, solvent evaporation, extraction with Et2O and distillation (95 °C, 0.2 mbar) gave 3.4 g (47%) of a 1:1 mixture of (*E*)- and (*Z*)-**2** separated by column chromatography on silica.

(*E*)-**3**: A mixture of (*E*)-**2** (0.9 g, 4 mmol), MeI (1.3 g, 9.3 mmol), Et2O (9 mL) and CH2Cl2 (1 mL) was stirred at 25 °C for 15 h. A white precipitate was collected (1.4 g, 84%) and mixed with Ag2O (1.1 g, 4.7 mmol) and H2O (20 mL). After stirring at 25 °C for 4 h the mixture was filtered (Celite). Distillation gave (*E*)-**3** (470 mg, 72%), b.p. 78-80 °C (0.1 mbar). 1H NMR (400 MHz, CDCl3):  = 7.33 (m, 1H), 7.21 (m, 3H), 7.19 (d, 2*J*(H,F) = 83.0 Hz, HCF), 5.67 (br s), 5.39 (m, H2C=C(2)), 2.80 (t, 3*J* = 6.5 Hz, H2C(4)), 2.66 (tt, 3*J* = 6.5 Hz, 4*J* = 1.4 Hz, H2C(3)).

(*Z*)-**3**: Same procedure as for the preparation of (*E*)-**3**, starting from (*Z*)-**2** (600 mg, 2.7 mmol) and MeI (900 mg, 6.3 mmol). Yield: 90 mg (25%) of pure (*Z*)-**3**, colorless oil; b.p. 78-80 °C/0.1 mbar. 1H NMR (400 MHz, CD2Cl2):  = 7.91 (m, 1H), 7.22 (m, 3H), 7.11 (d, 2*J*(H,F) = 84.0 Hz, HCF), 5.14 (br s, H(*Z*)C-C(2)), 4.85 (m, 2*J* = 4*J* = 5*J* = 1.4 Hz, H(*E*)C-C(2)), 2.91 (t, 3*J* = 6.4 Hz, H2C(4)), 2.57 (td, 3*J* = 6.4 Hz, 4*J* = 1.4, H2C(3)). Structures of (*E*)-**3** and (*Z*)-**3** are confirmed by their 2D NOESY 1H NMR spectra.

**4**: (*Z*)-**3** (40 mg, 0.23 mmmol), CD2Cl2 (0.25 mL), CFCl3 (0.1 mL) and SO2 (0.15 mL, 4.6 mmol) are mixed in a 5 mm NMR tube vac. line) and warm up to –80 °C (15 h). 1H NMR (400 MHz, CD2Cl2/SO2/CFCl3, 203 K):  = 7.25 (m, 4H), 6.37 (dddd, 2*J*(H,F) = 52.0 Hz, 5*J*(H-2,Ht-5) = 1.55 Hz, 5*J*(H-2,Ht-7) = 1.50 Hz, 5*J*(H-2,Hc-7) = 1.45 Hz, H-2), 3.89 (ddddd, 2*J* = 17.7 Hz, 5*J*(H,F) = 7.6 Hz, 4*J*(Ht-5,H t-7)  4*J*(Ht-5,Hc-7)  5*J*(Ht-5,H-2) = 1.5 Hz, Ht-5), 3.40 (br dd, 2*J* = 17.7, 5*J*(H,F) = 6.3 Hz, Hc-5), 2.91 (m, 2H), 2.50 (m, 2H) (Hc *cis*, Ht *trans* with respect to F).13C NMR (100.6 MHz, CD2Cl2/SO2/CFCl3, 203 K):  = 135.9, 130.1 (2s), 128.44, 128.40, 127.1, 123.1 (4d, 1*J*(C,H) = 162 Hz), 127.0 (d, 3*J*(C,F) = 6.0 Hz, C-6), 122.7 (d, 2*J*(C,F) = 21 Hz, C-1), 98.7 (dd, 1*J*(C,H) = 184 Hz, 1*J*(C,F) = 226 Hz, C-2), 50.9 (t, 1*J*(C,H) = 139 Hz, C-5), 28.4 (t, 1*J*(C,H) = 129 Hz, C-8), 26.3 (t, 1*J*(C,H) = 133 Hz, C-7); 19F NMR (376.5 MHz, CD2Cl2/SO2/CFCl3, 203 K):  = -104.1 (d, 2*J*(H,F) = 52.0 Hz).

**5**: The solution of **4** obtained above was warmed to –40 °C. After 15 h complete conversion of **4** (<5%) into **5** (>95%) was observed. Alternatively, (*E*)-**3** (40 mg) was mixed with CD2Cl2 (0.25 mL), CFCl3 (0.1 g) and SO2 (0.15 mL) and allowed to react at –40 °C for 2 h. 1H NMR (400 MHz, CD2Cl2/SO2/CFCl3, 233 K):  = 7.28 (m, 4H), 6.65 (br d, 2*J*(H,F) = 53.0 Hz, H-2), 3.82 (dd, 2*J* = 16.3 Hz, 5*J*(H,F) = 6.2 Hz, 5*J*(H-2,Hc-5) <0.2 Hz, Hc-5), 3.63 (ddd, 2*J* = 16.3 Hz, 5*J*(H,F) = 5.6 Hz, 5*J*(H-2,Ht-5) = 0.8 Hz, Ht-5), 2.91, 2.47 (2m, 4H). 13C NMR (100.6 MHz, CD2Cl2/SO2/CFCl3, 233 K):  = 136.1, 130.5 (2s), 130.1 (d, 3*J*(C,F) = 6 Hz, C-6), 128.9, 128.8, 127.6, 123.2 (4d, 1*J*(C,H) = 158-160 Hz), 126.3 (d, 2*J*(C,F) = 20 Hz, C-1), 103.5 (dd, 1*J*(C,H) = 184 Hz, 1*J*(C,F) = 221 Hz, C-2), 54.5 (t, 1*J*(C,H) = 142 Hz, C-5), 29.6 (t, 1*J*(C,H) = 130 Hz, C-8), 27.0 (t, 1*J*(C,H) = 125 Hz, C-7); 19F NMR (376.5 MHz, CD2Cl2/SO2/CFCl3, 233 K):  = -110.6 (d, 2*J*(H,F) = 53 Hz).

Table S1: Crystal data and structure refinement for **5** (*trans*-1-fluoro-1,4,9,10-tetrahydronaphth[2,1-d][2,3]oxathiin-3-oxide).

Empirical formula C12H11FO2S

Formula weight 238.27

Temperature 143(2) K

Wavelength 0.71073 Å

Crystal system Monoclinic

Space group P2(1)/n

Unit cell dimensions a = 7.8271(9) Å  = 90°.

b = 13.982(2) Å

 = 106.577(12)°.

c = 10.1237(15) Å

 = 90°.

Volume 1061.9(3) Å3

Z 4

Density (calculated) 1.490 Mg/m3

Absorption coefficient 0.299 mm-1

F(000) 496

Crystal size 0.35 x 0.28 x 0.20 mm3

Theta range for data collection 3.59 to 25.02°.

Index ranges -9<=h<=9, -16<=k<=16,

-10<=l<=11

Reflections collected 5521

Independent reflections 1795 [R(int) = 0.0459]

Completeness to theta = 0.50° 0.0 %

Absorption correction None

Max. and min. transmission 0.9426 and 0.9026

Refinement method Full-matrix least-squares

on F2

Data / restraints / parameters 1795 / 0 / 146

Goodness-of-fit on F2 1.127

Final R indices [I>2sigma(I)] R1 = 0.0520, wR2 = 0.1249

R indices (all data) R1 = 0.0572, wR2 = 0.1293

Extinction coefficient 0.004(3)

Largest diff. peak and hole 0.284 and -0.386 e.Å-3

Table S2: Bond lengths [Å] and angles [°] of **5** (atom numbering of Fig. 1).

| S(1)-O(2) | 1.475(2) | O(1)-C(1)-F(1) | 106.6(2) |
| --- | --- | --- | --- |
| S(1)-O(1) | 1.6840(19) | O(1)-C(1)-C(2) | 114.6(2) |
| S(1)-C(4) | 1.796(3) | F(1)-C(1)-C(2) | 110.8(2) |
| O(1)-C(1) | 1.413(3) | C(3)-C(2)-C(8) | 119.9(2) |
| C(1)-F(1) | 1.414(3) | C(3)-C(2)-C(1) | 122.1(2) |
| C(1)-C(2) | 1.511(4) | C(8)-C(2)-C(1) | 117.9(2) |
| C(2)-C(3) | 1.351(3) | C(2)-C(3)-C(5) | 121.6(2) |
| C(2)-C(8) | 1.498(3) | C(2)-C(3)-C(4) | 123.3(2) |
| C(3)-C(5) | 1.514(4) | C(5)-C(3)-C(4) | 115.1(2) |
| C(3)-C(4) | 1.517(4) | C(3)-C(4)-S(1) | 110.68(18) |
| C(5)-C(6) | 1.530(4) | C(3)-C(5)-C(6) | 112.1(2) |
| C(6)-C(7) | 1.519(4) | C(7)-C(6)-C(5) | 111.6(2) |
| C(7)-C(12) | 1.400(4) | C(12)-C(7)-C(8) | 119.8(2) |
| C(7)-C(8) | 1.410(4) | C(12)-C(7)-C(6) | 120.9(3) |
| C(8)-C(9) | 1.411(4) | C(8)-C(7)-C(6) | 119.2(2) |
| C(9)-C(10) | 1.403(4) | C(7)-C(8)-C(9) | 119.1(2) |
| C(10)-C(11) | 1.390(5) | C(7)-C(8)-C(2) | 118.8(2) |
| C(11)-C(12) | 1.398(4) | C(9)-C(8)-C(2) | 122.0(2) |
| O(2)-S(1)-O(1) | 102.91(11) | C(10)-C(9)-C(8) | 120.4(3) |
| O(2)-S(1)-C(4) | 106.94(13) | C(11)-C(10)-C(9) | 119.9(3) |
| O(1)-S(1)-C(4) | 93.57(11) | C(10)-C(11)-C(12) | 120.2(3) |
| C(1)-O(1)-S(1) | 113.98(16) | C(11)-C(12)-C(7) | 120.4(3) |

Symmetry transformation used to generate equivalent atoms.


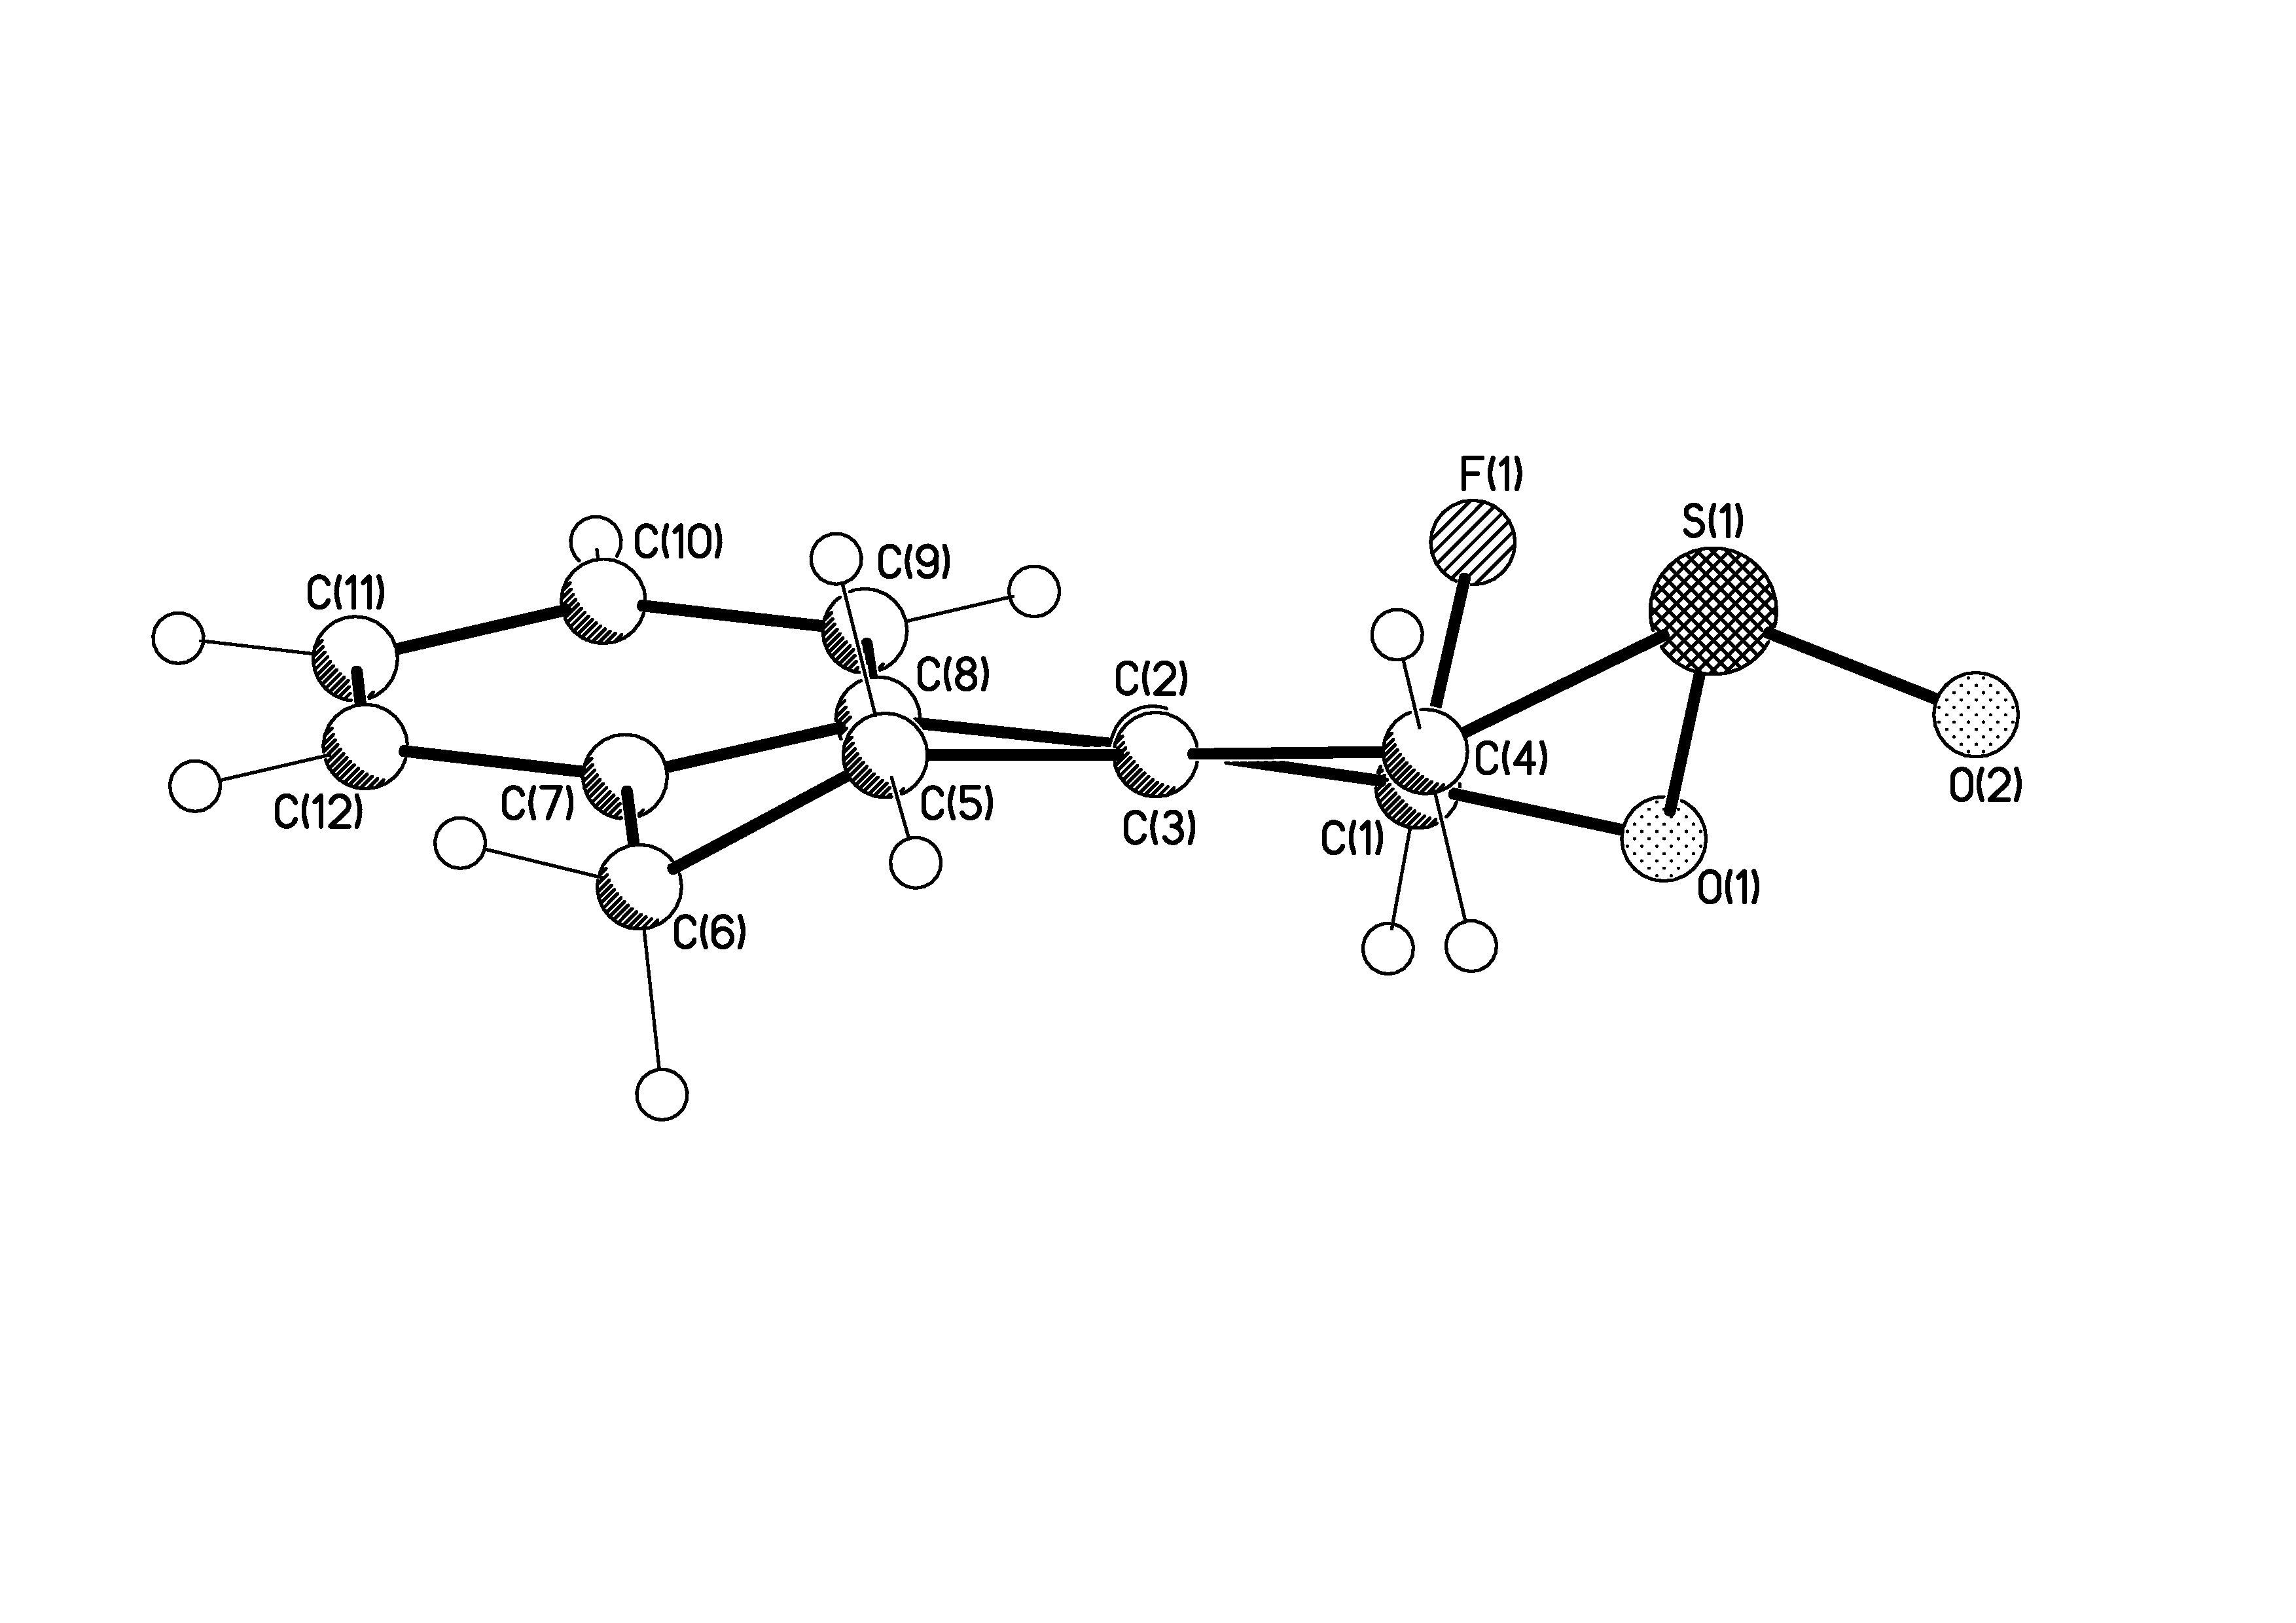


Table S3: Torsion angles [°] in **5** (atom numbering of Fig. 1).

O(2)-S(1)-O(1)-C(1) 179.11(18)

C(4)-S(1)-O(1)-C(1) 70.82(19)

S(1)-O(1)-C(1)-F(1) 73.4(2)

S(1)-O(1)-C(1)-C(2) -49.5(3)

O(1)-C(1)-C(2)-C(3) 2.3(4)

F(1)-C(1)-C(2)-C(3) -118.3(3)

O(1)-C(1)-C(2)-C(8) -174.3(2)

F(1)-C(1)-C(2)-C(8) 65.1(3)

C(8)-C(2)-C(3)-C(5) 4.8(4)

C(1)-C(2)-C(3)-C(5) -171.8(2)

C(8)-C(2)-C(3)-C(4) -173.1(2)

C(1)-C(2)-C(3)-C(4) 10.4(4)

C(2)-C(3)-C(4)-S(1) 21.2(3)

C(5)-C(3)-C(4)-S(1) -156.84(18)

O(2)-S(1)-C(4)-C(3) -158.32(18)

O(1)-S(1)-C(4)-C(3) -53.67(19)

C(2)-C(3)-C(5)-C(6) 27.4(3)

C(4)-C(3)-C(5)-C(6) -154.6(2)

C(3)-C(5)-C(6)-C(7) -45.7(3)

C(5)-C(6)-C(7)-C(12) -147.7(2)

C(5)-C(6)-C(7)-C(8) 35.8(3)

C(12)-C(7)-C(8)-C(9) 0.1(4)

C(6)-C(7)-C(8)-C(9) 176.7(2)

C(12)-C(7)-C(8)-C(2) 179.0(2)

C(6)-C(7)-C(8)-C(2) -4.4(3)

C(3)-C(2)-C(8)-C(7) -17.4(3)

C(1)-C(2)-C(8)-C(7) 159.2(2)

C(3)-C(2)-C(8)-C(9) 161.4(2)

C(1)-C(2)-C(8)-C(9) -21.9(3)

C(7)-C(8)-C(9)-C(10) 0.0(4)

C(2)-C(8)-C(9)-C(10) -178.9(2)

C(8)-C(9)-C(10)-C(11) 0.0(4)

C(9)-C(10)-C(11)-C(12) -0.1(4)

C(10)-C(11)-C(12)-C(7) 0.2(4)

C(8)-C(7)-C(12)-C(11) -0.2(4)

C(6)-C(7)-C(12)-C(11) -176.7(3)

Symmetry transformations used to generate equivalent atoms

Table S4: Different contributionsa (absolute energies) to the G3 (see the text for details) energies (au) for the hetero Diels-Alder (sultines) reactions of (*E*) and (*Z*)-1-fluoro-1,3-butadiene ((*E*)-**6**, (*Z*)-**6**) with SO2.

| Structure | QCISD(T)/6-31G(d) | MP4/6-31G(d) | MP4/6-31+G(d) | MP2/6-31G(2df, p) | MP2/6-31+G(3df, 2p) |
| --- | --- | --- | --- | --- | --- |
| SO2 | -547.6992449 | -547.7108816 | -547.7280417 | -547.8319637 | -547.8690067 |
| (*E*)-(**6**) | -254.5047185 | -254.5038984 | -254.5261972 | -254.6215026 | -254.6640583 |
| (*Z*)-(**6**) | -254.5060958 | -254.5052615 | -254.5270329 | -254.6228458 | -254.6648493 |
| sultine S-**7** | -802.2204374 | -802.2255702 | -802.2651453 | -802.4700967 | -802.5478549 |
| ‡((*E*)-**6** + SO2)**7** | -802.1746542 | -802.1864281 | -802.2284744 | -802.4378465 | -802.5179350 |
| sultine C-**8** | -802.2185718 | -802.2232400 | -802.2634112 | -802.4685069 | -802.5471684 |
| ‡((*Z*)-**6** + SO2)**8** | -802.1711172 | -802.1828306 | -802.2246957 | -802.4336705 | -802.5127621 |
| sultine S-**8** | -802.2190691 | -802.2242678 | -802.2645537 | -802.4689332 | -802.5475387 |
| ‡((*E*)-**6** + SO2)**8** | -802.1739295 | -802.1861941 | -802.2277397 | -802.4373129 | -802.5169194 |
| sultine C-**7** | -802.2131574 | -802.2184553 | -802.2589227 | -802.4646632 | -802.5435677 |
| ‡((*Z*)-**6** + SO2)**7** | -802.1705303 | -802.1829008 | -802.2232035 | -802.4326219 | -802.5096514 |
| sultine B-**8** | -802.2172346 | -802.2223977 | -802.2627977 | -802.4676310 | -802.5462749 |
| ‡(C-**8**B-**8**) | -802.2106019 | -802.2154797 | -802.2561347 | -802.4595847 | -802.5381778 |
| sultine B-**7** | -802.2158889 | -802.2211493 | -802.2602597 | -802.4658659 | -802.5429328 |
| ‡(S-**7**B-**7**) | -802.2143624 | -802.2194545 | -802.2586199 | -802.4641315 | -802.5415782 |
| ‡(S-**8**B-**8**) | -802.2161815 | -802.2211527 | -802.2620239 | -802.4662240 | -802.5453271 |
| ‡(C-**7**B-**7**) | -802.2073722 | -802.2125992 | -802.2523082 | -802.4583928 | -802.5360369 |
| B‡-**7** | -802.2041615 | -802.2092763 | -802.2496215 | -802.4552465 | -802.533955 |
| B‡-**8** | -802.2106508 | -802.2158353 | -802.2561772 | -802.4608917 | -802.5397146 |

Table S4 (cont.)

| Structure | MP4/6-31G(2df, p) | MP2/6-31+G(d) | MP2/6-31G(d) | MP2(full)/ G3L | MP2/6-311 +  G(3df, 2p) | ZPE/MP2/6-31G(d)b |
| --- | --- | --- | --- | --- | --- | --- |
| SO2 | -547.8721128 | -547.6983449 | -547.6824799 | -548.3413499 | -547.9509830 | 0.00627 |
| (E)-(**6**) | -254.6964741 | -254.4609943 | -254.4393841 | -254.9587640 | -254.7485470 | 0.07565 |
| (Z)-(**6**) | -254.6978628 | -254.4618938 | -254.4407266 | -254.9593971 | -254.7492354 | 0.07596 |
| sultine S-**7** | -802.5832544 | -802.1717581 | -802.1350100 | -803.3095455 | -802.7102810 | 0.08896 |
| ‡((*E*)-**6** + SO2)**7** |  | -802.1364605 | -802.0973876 | -803.2814456 | -802.6806500 | 0.08576 |
| sultine C-**8** |  | -802.1701373 | -802.1326769 | -803.3091185 | -802.7098593 | 0.08904 |
| ‡((*Z*)-**6** + SO2)**8** |  | -802.1322638 | -802.0933545 | -803.2762556 | -802.6755143 | 0.08571 |
| sultine S-**8**c) |  | -802.1712962 | -802.1337252 | -803.3093417 | -802.7099814 | 0.08883 |
| ‡((*E*)-**6** + SO2)**8** |  | -802.1359383 | -802.0972365 | -803.2804675 | -802.6798065 | 0.08554 |
| sultine C-**7** |  | -802.1657904 | -802.1280154 | -803.3054113 | -802.7060954 | 0.08886 |
| ‡((*Z*)-**6** + SO2)**7** |  | -802.1306180 | -802.0933183 | -803.2728235 | -802.6722573 | 0.08562 |
| sultine B-**8** |  | -802.1696211 | -802.1320292 | -803.3078584 | -802.7087313 | 0.08874 |
| ‡(C-**8**B-**8**) |  | -802.1621630 | -802.1242303 | -803.2998450 | -802.7006007 | 0.08823 |
| sultine B-**7** |  | -802.1667662 | -802.1304263 | -803.3046405 | -802.7054891 | 0.08855 |
| ‡(S-**7**B-**7**) |  | -802.164785 | -802.1284201 | -803.3033237 | -802.7039986 | 0.08849 |
| ‡(S-**8**B-**8**) |  | -802.1687767 | -802.1307546 | -803.3070805 | -802.7078011 | 0.08882 |
| ‡(C-**7**B-**7**) |  | -802.1590745 | -802.1221048 | -803.2980716 | -802.6988619 | 0.08881 |
| B‡-**7** |  | -802.1558211 | -802.1181406 | -803.2957553 | -802.6965678 | 0.08800 |
| B‡-**8** |  | -802.1627795 | -802.1251745 | -803.3015868 | -802.7023886 | 0.08814 |

a Optimizations were carried out at the MP2/6-31G(d) level of theory.

b MP2/6-31G(d) frequencies scaled by 0.96.

c Corresponds to the structure found for **5**.

Table S5: Different contributionsa to the G3 (see text for details) energies (kcal/mol) for the located minima and transition states of the hetero-Diels-Alder additions of SO2 to (*E*)- and (*Z*)-1-fluorobutadiene ((*E*)-, (*Z*)-**6**) giving sultines **7** (*cis*) and **8** (*trans*). The energies corresponding to the transition structures involving the (*Z*) isomer are referred to (*Z*)-**6** + SO2. The rest are referred to (*E*)-**6** + SO2.f

| Structure | E(MP4) | E(+) | E(2df,p)c | E(QCI) | E(G3L) | E (ZPE)e | G3 |
| --- | --- | --- | --- | --- | --- | --- | --- |
| sultine S-**7** | -6.8 | -0.1 | -2.2 | -3.6 | 4.1 | 4.4 | -4.1 |
| ‡((*E*)-**6** + SO2)**7** | 17.8 | -1.6 | -5.6 | 0.6 | 2.9 | 2.4 | 16.5 |
| ‡((*E*)-**6** + SO2**8**) | 17.9 | -1.3 | -5.3 | 0.9 | 3.0 | 2.3 | 17.4 |
| sultine S-**8** | -5.9 | -0.5 | -2.3 | -3.5 | 4.0 | 4.3 | -3.9 |
| ‡((*Z*)-**6** + SO2)**8** | 20.9 | -1.8 | -5.5 | 0.6 | 3.3 | 2.2 | 19.6 |
| ‡((*Z*)-**6** + SO2**7**) | 20.9 | -0.9 | -4.8 | 1.0 | 3.8 | 2.1 | 22.0 |
| sultine C-**7** | -2.3 | -0.6 | -3.2 | -3.5 | 3.9 | 4.3 | -1.3 |
| sultine B-**7** | -4.0 | 0.2 | -2.4 | -3.5 | 4.2 | 4.2 | -1.3 |
| ‡(S-**7**B-**7**) | -2.9 | 0.2 | -2.6 | -3.6 | 4.0 | 4.1 | -0.8 |
| ‡(C-**7**B-**7**) | 1.4 | -0.2 | -2.9 | -3.5 | 4.1 | 4.3 | 3.1 |
| B‡-**7** | 3.4 | 0.6 | -3.4 | -3.6 | 4.0 | 3.8 | 4.8 |
| sultine C-**8** | -5.3 | -0.4 | -2.6 | -3.9 | 3.8 | 4.5 | -4.0 |
| sultine B-**8** | -4.8 | -0.6 | -2.5 | -3.5 | 4.1 | 4.3 | -3.0 |
| ‡(S-**8**B-**8**) | -4.0 | -0.9 | -2.4 | -3.7 | 4.0 | 4.3 | -2.7 |
| ‡(C-**8**B-**8**) | -0.4 | -0.7 | -2.3 | -3.7 | 4.3 | 4.0 | 1.0 |
| B‡-**8** | -0.7 | -0.5 | -2.6 | -3.5 | 3.8 | 3.9 | 0.4 |

a E(MP4) = E[MP4/6-31G(d)]SYSTEM – E[MP4/6-31G(d)]REACTANTS; E(A) = E(A)SYSTEM - E(A)REACTANTS where A stands for the different contributions.

b Optimizations were carried out at the MP2/6-31G(d) level of theory.

c Contribution estimated at the MP2 level of theory.

d Contribution estimated at the MP4 level of theory.

e MP2/6-31G(d) frequencies scaled by 0.96.

f Table S4 of the Supplementary Materialcollects the corresponding absolute energies.

Figure S1. Minimized conformers for fluorosultine **7** (*cis*) and the transition structures of their interconversion (bond lengths in Å).

| S-**7** | B-**7** | C-**7** |
| --- | --- | --- |
|  |  |  |

| ‡(S-**7**B-**7**) | ‡(C-**7**B-**7**) | B‡-**7** |
| --- | --- | --- |
|  |  |  |

Figure S2. Minimized conformers for fluorosultine **8** (*trans*) and the transition strucutres of their interconversion (bond lengths in Å).

| *) S-**8** | B-**8** | C-**8** |
| --- | --- | --- |
|  |  |  |

| ‡(S-**8**B-**8**) | ‡(S-**8**B-**8**) | B‡-**8** |
| --- | --- | --- |
|  |  |  |

*) Structures S-**8** corresponds to that found in the crystal of **5** (*trans*-1-fluoro-1,4,9,10-tetrahydronaphth[2,1-d] [2,3]oxathiin-3-oxide)

Figure S3. Calculated transition structures for the hetero-Diels-Alder addition of SO2 to (*E*)-1-fluorobutadiene ((*E*)-**6**) and (*Z*)-1-fluorobutadiene ((*E*)-**6**) (bond lengths in Å).

| ‡((*E*)-**6** + SO2)**7**) | ‡((*E*)-**6** + SO2)**8**) |  | ‡((*Z*)-**6** + SO2)**8**) | ‡((*Z*)-**6** + SO2)**7**) |
| --- | --- | --- | --- | --- |
| E‡ = 16.5 kcal/mol | E‡ = 17.4 kcal/mol |  | E‡ = 19.6 kcal/mol | E‡ = 22.0 kcal/mol |
|  |  |  |  |  |
| *endo* mode  (Alder rule) | *exo* mode |  | *endo* mode  (Alder rule) | *exo* mode |
|  |  |  |  |  |
|  | |  |  | |

1. [ *] Prof. P. Vogel, E. Roversi, R. Scopelliti, E. Solari,

   Section de chimie de l'Université de Lausanne

   BCH, CH 1015 Lausanne-Dorigny (Switzerland)

   Fax: (+44) 692 39 75; e-mail: pierre.vogel@ico.unil.ch

   [*] Prof. J. A. Sordo, P. Braña, B. Menéndez

   Departamento de Química Física y Analítica, Universidad de Oviedo, Oviedo (Spain) [↑](#footnote-ref-2)
2. [ [↑](#footnote-ref-3)
